# Supplementary material for: NAC1 Maintains Root Meristem Activity by Repressing the Transcription of E2Fa in Arabidopsis
Source: Int J Mol Sci. 2022 Oct 14;23(20):12258. doi: 10.3390/ijms232012258 (PMC9603599; doi:10.3390/ijms232012258)
Supplement: Supplementary file 1 [file ijms-23-12258-s001.zip › supplementary Table S1.xlsx]

## Sheet: Sheet2
Primers	Sequences	Notes
SALK_098992.53.95.x_LP	TGAACCACCAGTAAACAAGGG	nac1-1 genotyping
SALK_098992.53.95.x_RP	ATTCTCTCCTTTGCTTACGCC
SALK_052190_LP	GAAGGACGATGAGCTTGTCTG	nac1-2 genotyping
SALK_052190_RP	CATGTGATTAAATGTTAGCGCC
GABI_348E09_LP	TCCTGGTGGTGGAGTACTCAC	e2fa genotyping
GABI_348E09_RP	GGTTTCCAGGTCTGTCTTTCC
E2Fa_qRT_F	CGAAGCCTTAACTGTTGACAACC	E2Fa qRT-PCR
E2Fa_qRT_R	GCATTTGAGAGAAGCCAGTAGTCC
ACT2_qRT_F	TTGACTACGAGCAGGAGATGG	ACT2 RT-PCR
ACT2_qRT_R	ACAAACGAGGGCTGGAACAAG
E2Fa-p0800-KpnI-F	CGGGGTACCTGTAATGAATGATGATGAAGAACTCAAGC	E2Fa promoter cloning
E2Fa-p0800-SalI-R	GCGTCGACGGATCGTAGTGAAGCGAGAGTCGAA
E2Fb-p0800-HindIII-F	CCAAGCTTATGGGAAACAAAGCTACAACGGTGA	E2Fb promoter cloning
E2Fb-p0800-BamHI-R	CGGGATCCCCAGGAGCAACTAGAGGAGG
E2Fc-p0800-HindIII-F	CCAAGCTTGGGTTAAAATCTAATAGTTGT	E2Fc promoter cloning
E2Fc-p0800-BamHI-R	CGGGATCCTGTAACGGCGGTGTATCT
pE2Fa-pAbai-HindIII-1-F	CCCAAGCTT GTGAACGAGAAATCAAGTGTATGTA	Yeast one-hybrid binding assay
pE2Fa-pAbai-XhoI-1-R	CCGCTCGAG ATTTGGAGGACTATAATATTGCACA
pE2Fa-pAbai-HindIII-2-F	CCCAAGCTTACTGAATTGAATTATGAATCCT	Yeast one-hybrid binding assay
pE2Fa-pAbai-XhoI-2-R	CCGCTCGAG GGATCGTAGTGAAGCGAGAG
pE2Fb-pAbai-SacI-F	CGAGCTCCGTATAAGTTCGACAGATTTTGACG	Yeast one-hybrid binding assay
pE2Fb-pAbai-SalI-R	GCGTCGACGAAAATTGTCACGGAAACTCG
pE2Fc-pAbai-SacI-1-F	CGAGCTCCGTGACGAACTGCTTGATGATGCTC	Yeast one-hybrid binding assay
pE2Fc-pAbai-SalI-1-R	GCGTCGACAGTGTATACGCCATTATACACCA
pE2Fc-pAbai-SacI-2-F	CGAGCTCCGTCGTAATATATAAAAATTAATTGATT	Yeast one-hybrid binding assay
pE2Fc-pAbai-SalI-2-R	GCGTCGACTCGTTCGCAAATGATGAATAAG
pE2Fc-pAbai-SacI-3-F	CGAGCTCTCGTGATATTGCCGCAAA	Yeast one-hybrid binding assay
pE2Fc-pAbai-SalI-3-R	GCGTCGACTGTAATTGTTCGCATAGTCGTT
pE2Fc-pAbai-SacI-4-F	CGAGCTCCGTCTTTTTTTTTTATAGGACAGG	Yeast one-hybrid binding assay
pE2Fc-pAbai-SalI-4-R	GCGTCGACTTTTCGTATCGCATAAGTTTGA
E2Fa-ChIP-A-F	TGTAATGAATGATGATGAAGAACT	ChIP-qPCR
E2Fa-ChIP-A-R	CAACTCTACACGGTTTCTGG
E2Fa-ChIP-B-F	TTGCAGAGAATTGTGATT	ChIP-qPCR
E2Fa-ChIP-B-R	GAGAATCCGATCATAGAC
E2Fa-ChIP-C-F	TTCAACTTGATAACGACTT	ChIP-qPCR
E2Fa-ChIP-C-R	TTGGTAAAGACCTAGATTG
E2Fa-ChIP-D-F	CAATTTCTATTTACCCTTTCT	ChIP-qPCR
E2Fa-ChIP-D-R	TTAGTGGTTGTTGTATCAT
E2Fa-ChIP-E-F	GAAAGGCGACAATGGATA	ChIP-qPCR
E2Fa-ChIP-E-R	AGATGGGTGTTTGAGGAG
E2Fa-BIO-F1	CGTGAAATGCCAGTGGTCTATGATCGGATTCTCTGTTTCCCGTTCTCCTTCTTTTTTTGGGCCTTAAATCCGTTT	EMSA
E2Fa-BIO-R1	AAACGGATTTAAGGCCCAAAAAAAGAAGGAGAACGGAAACAGAGAATCCGATCATAGACCACTGGCATTTCACG
E2Fa-COM-F1	CGTGAAATGCCAGTGGTCTATGATCGGATTCTCTGTTTCCGTTCTCCTTCTTTTTTTGGGCCTTAAATCCGTTT	EMSA
E2Fa-COM-R1	AAACGGATTTAAGGCCCAAAAAAAGAAGGAGAACGGAAACAGAGAATCCGATCATAGACCACTGGCATTTCACG
E2Fa-BIO-F2	CGTGTAGAGTTGCGATTTGCAGAGAATTGTGATTCTACAATTGGAGGCAAGATGATGAATGTGTGAACTGATTAGCGTAA	EMSA
E2Fa-BIO-R2	TTACGCTAATCAGTTCACACATTCATCATCTTGCCTCCAATTGTAGAATCACAATTCTCTGCAAATCGCAACTCTACACG
E2Fa-COM-F2	CGTGTAGAGTTGCGATTTGCAGAGAATTGTGATTCTACAATTGGAGGCAAGATGATGAATGTGTGAACTGATTAGCGTAA	EMSA
E2Fa-COM-R2	TTACGCTAATCAGTTCACACATTCATCATCTTGCCTCCAATTGTAGAATCACAATTCTCTGCAAATCGCAACTCTACACG
mNAC1ox-FP	ATGGAGACGGAAGAAGAGATGAAG	NAC1 coding sequence cloning
mNAC1ox-RP	GCAATTCCAAACAGTGCTTGGAAT
NAC1(1-199aa)-pGEX4T-1-SalI-F	GCGTCGACAAATGGAGACGGAAGAAGAGAT	NAC1 coding sequence cloning
NAC1(1-199aa)-pGEX4T-1-NotI-R	ATTTGCGGCCGCATCCATCAGTGGAGGAAGCG
NAC1pro:NAC1-FP	TCTCACCCACCGGTCGAAT	NAC1 coding sequence cloning
NAC1pro:NAC1-RP	GCAATTCCAAACAGTGCTTGGAAT
